# Supplementary material for: Systematic Analysis of the Association between Gut Flora and Obesity through High-Throughput Sequencing and Bioinformatics Approaches
Source: PubMed Central journal article supplement (PMC4150407; doi:10.1155/2014/906168), 2014-08-14
Supplement: 906168.f1.pdf [file 906168.f1.pdf]

(A)

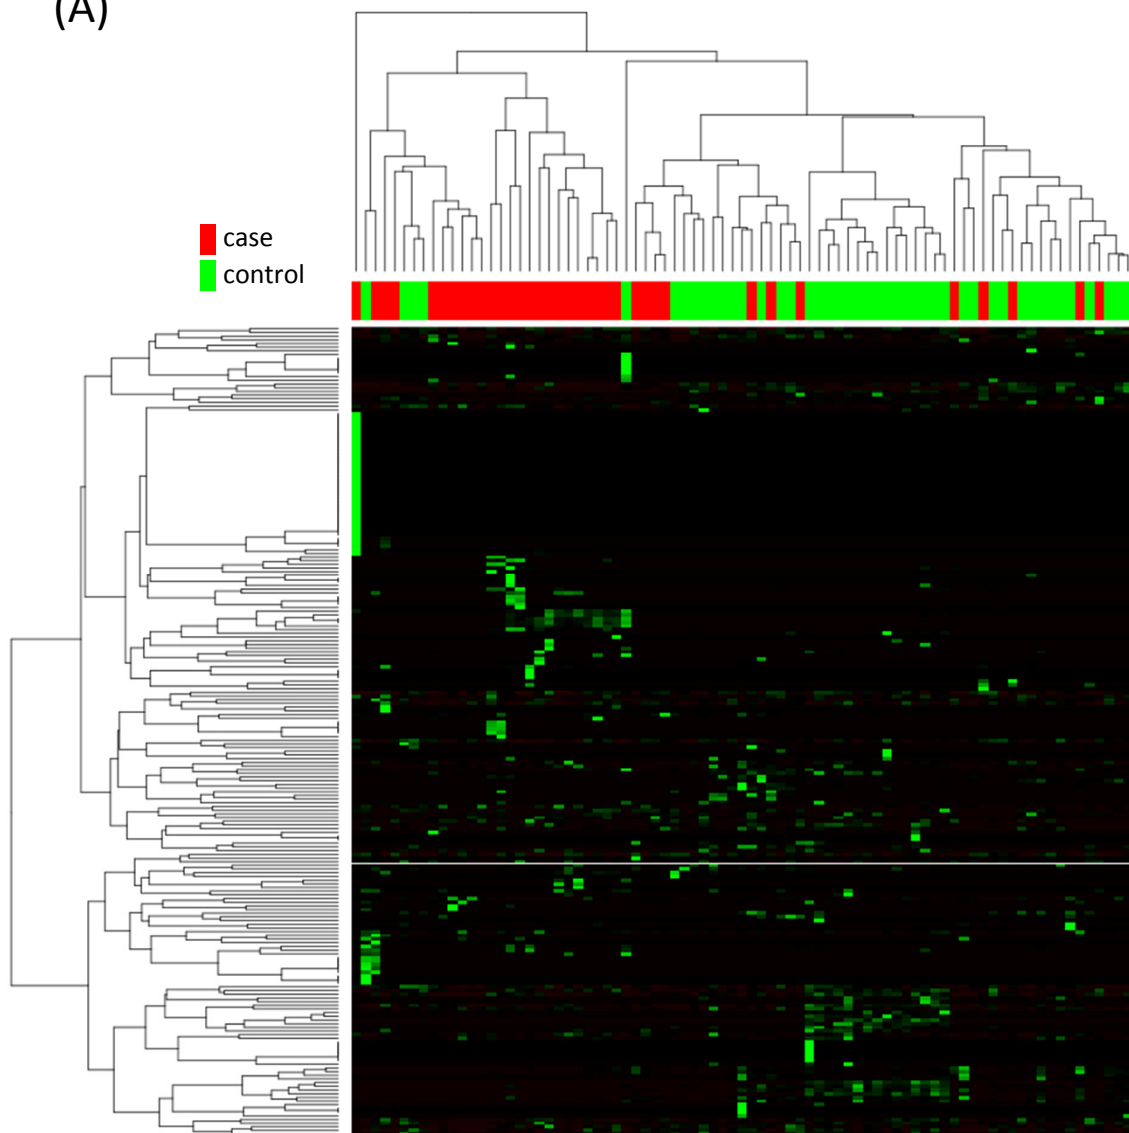

(B)

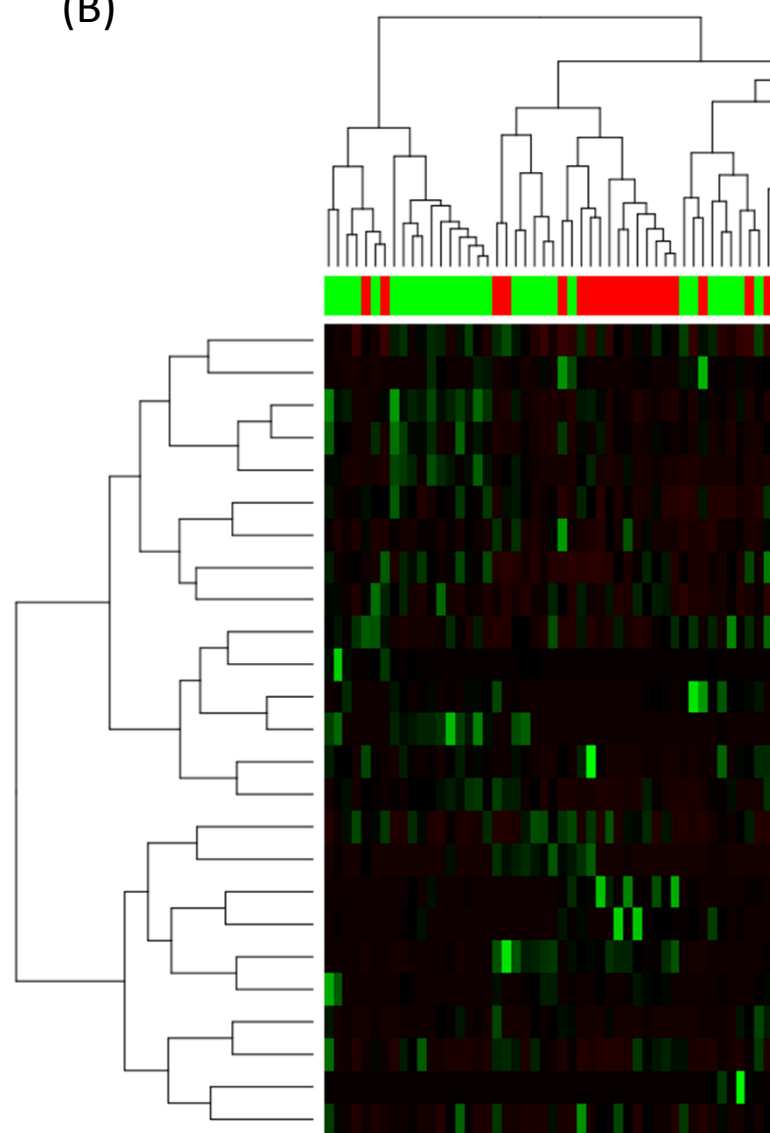

**Table S3.** Performance of classification of obesity and normal using *Parabacteroides distasonis* and *Serratia sp. DAP4*

|                  | <b>Normal</b> | <b>Case</b> |
|------------------|---------------|-------------|
| <b>TP Rate</b>   | 0.889         | 0.722       |
| <b>FP Rate</b>   | 0.278         | 0.111       |
| <b>Precision</b> | 0.800         | 0.839       |
| <b>Recall</b>    | 0.889         | 0.722       |
| <b>F-Measure</b> | 0.842         | 0.776       |
| <b>AUC</b>       | 0.813         | 0.813       |

TP: true positive, FP: false positive, Precision:  $TP/(TP+FP)$ , Recall= $TP/(TP+FN)$ , FN: false negative, F-Measure=  $2*Precision*Recall/(Precision+Recall)$ , AUC: area under the ROC curve, ROC: receiver operating characteristic

**Table S2.** Species with a significantly different presence between normal and case samples

| Genus                                                       | Presence<br>case/normal | Absence<br>case/normal | Fisher's test<br>p-value | Odds ratio<br>(95% CI) |
|-------------------------------------------------------------|-------------------------|------------------------|--------------------------|------------------------|
| <b>Butyricimonas virosa</b>                                 | 28/44                   | 8/1                    | 0.009                    | 0.082 (0.002-0.664)    |
| <b>Parabacteroides distasonis</b>                           | 27/5                    | 9/40                   | <0.001                   | 22.671 (6.443-97.631)  |
| <b>Parabacteroides merdae</b>                               | 6/30                    | 30/15                  | <0.001                   | 0.103 (0.029-0.322)    |
| <b>Alistipes shahii</b>                                     | 22/43                   | 14/2                   | <0.001                   | 0.076 (0.008-0.373)    |
| <b>Lactobacillus kunkeei</b>                                | 7/0                     | 29/45                  | 0.002                    | 10.583 (1.256-498.823) |
| <b>Clostridium aldenense</b>                                | 6/34                    | 30/11                  | <0.001                   | 0.068 (0.018-0.218)    |
| <b>Clostridium sp. Clone-17</b>                             | 0/15                    | 36/30                  | <0.001                   | 0.057 (0.001-0.412)    |
| <b>Eubacterium desmolans</b>                                | 2/17                    | 34/28                  | <0.001                   | 0.099 (0.010-0.475)    |
| <b>Blautia product</b>                                      | 2/20                    | 34/25                  | <0.001                   | 0.076 (0.008-0.358)    |
| <b>Lachnobacterium bovis</b>                                | 0/16                    | 36/29                  | <0.001                   | 0.052 (0.001-0.371)    |
| <b>uncultured Lachnospira sp.</b>                           | 22/43                   | 14/2                   | <0.001                   | 0.076 (0.008-0.373)    |
| <b>Syntrophococcus sucromutans</b>                          | 0/10                    | 36/35                  | 0.002                    | 0.099 (0.002-0.764)    |
| <b>Ruminococcus albus</b>                                   | 0/11                    | 36/34                  | <0.001                   | 0.088 (0.002-0.663)    |
| <b>Ruminococcus sp. ID1</b>                                 | 2/20                    | 34/25                  | <0.001                   | 0.076 (0.008-0.358)    |
| <b>Pectinatus cerevisiiphilus</b>                           | 0/14                    | 36/31                  | <0.001                   | 0.063 (0.001-0.460)    |
| <b>Comamonas testosteroni</b>                               | 0/10                    | 36/35                  | 0.002                    | 0.099 (0.002-0.764)    |
| <b>Sutterella stercoricanis</b>                             | 28/44                   | 8/1                    | 0.009                    | 0.082 (0.002-0.664)    |
| <b>Sutterella wadsworthensis</b>                            | 27/45                   | 9/0                    | <0.001                   | 0.069 (0.001-0.542)    |
| <b>Desulfovibrio sp. enrichment culture clone Jdgsrb011</b> | 1/11                    | 35/34                  | 0.010                    | 0.090 (0.002-0.683)    |
| <b>Pseudoalteromonas piscicida</b>                          | 12/1                    | 24/44                  | <0.001                   | 21.261 (2.837-956.295) |
| <b>Shewanella algae</b>                                     | 15/3                    | 21/42                  | <0.001                   | 9.703 (2.381-58.040)   |

|                                 |       |       |        |                        |
|---------------------------------|-------|-------|--------|------------------------|
| <b>Citrobacter amalonaticus</b> | 14/41 | 22/4  | <0.001 | 0.065 (0.014-0.234)    |
| <b>Citrobacter sp. I91-10</b>   | 0/10  | 36/35 | 0.002  | 0.099 (0.002-0.764)    |
| <b>Cronobacter sakazakii</b>    | 6/34  | 30/11 | <0.001 | 0.068 (0.018-0.218)    |
| <b>Enterobacter cloacae</b>     | 3/22  | 33/23 | <0.001 | 0.098 (0.017-0.381)    |
| <b>Enterobacter hormaechei</b>  | 0/16  | 36/29 | <0.001 | 0.052 (0.001-0.371)    |
| <b>Erwinia rhapontici</b>       | 2/16  | 34/29 | 0.001  | 0.109 (0.011-0.526)    |
| <b>Leclercia adecarboxylata</b> | 8/36  | 28/9  | <0.001 | 0.075 (0.021-0.233)    |
| <b>Rahnella sp. EMA-83</b>      | 0/13  | 36/32 | <0.001 | 0.070 (0.002-0.516)    |
| <b>Serratia proteamaculans</b>  | 0/17  | 36/28 | <0.001 | 0.047 (0.001-0.336)    |
| <b>Serratia sp. DAP4</b>        | 0/16  | 36/29 | <0.001 | 0.052 (0.001-0.371)    |
| <b>Serratia sp. M1</b>          | 0/16  | 36/29 | <0.001 | 0.052 (0.001-0.371)    |
| <b>uncultured Serratia sp.</b>  | 0/17  | 36/28 | <0.001 | 0.047 (0.001-0.336)    |
| <b>uncultured Shigella sp.</b>  | 5/31  | 31/14 | <0.001 | 0.076 (0.019-0.250)    |
| <b>Tatumella sp. L3-179</b>     | 0/16  | 36/29 | <0.001 | 0.052 (0.001-0.371)    |
| <b>Marinomonas posidonica</b>   | 12/1  | 24/44 | <0.001 | 21.261 (2.837-956.295) |
| <b>Aliivibrio fischeri</b>      | 8/1   | 28/44 | 0.009  | 12.231 (1.505-568.466) |

**Table S1.** Characteristics of each sample

|     | <b>Reads#</b> | <b>Gender</b> | <b>Age</b> | <b>Height (cm)</b> | <b>Weight (kg)</b> | <b>BMI</b> |
|-----|---------------|---------------|------------|--------------------|--------------------|------------|
| S1  | 61780         | M             | 50         | 169                | 67                 | 23.5       |
| S2  | 29956         | F             | 26         | 158                | 53                 | 21.2       |
| S3  | 14271         | M             | 68         | 168                | 60                 | 21.3       |
| S4  | 20330         | M             | 24         | 173                | 64                 | 21.4       |
| S5  | 18597         | F             | 30         | 165                | 62                 | 22.8       |
| S6  | 17055         | F             | 26         | 160                | 50                 | 19.5       |
| S7  | 135847        | F             | 43         | 164                | 62                 | 23.1       |
| S8  | 22941         | M             | 54         | 172                | 54                 | 18.3       |
| S9  | 18387         | F             | 27         | 167                | 56                 | 20.1       |
| S10 | 63130         | M             | 36         | 173                | 68                 | 22.7       |
| S11 | 72530         | F             | 30         | 159                | 59                 | 23.3       |
| S12 | 34060         | F             | 26         | 163                | 53                 | 19.9       |
| S13 | 43321         | F             | 28         | 164                | 55                 | 20.4       |
| S14 | 51859         | F             | 27         | 162                | 46                 | 17.5       |
| S15 | 54715         | M             | 24         | 171                | 70                 | 23.9       |
| S16 | 58688         | M             | 27         | 175                | 68                 | 22.2       |
| S17 | 31877         | M             | 23         | 174                | 70                 | 23.1       |
| S18 | 89940         | M             | 52         | 165                | 65                 | 23.9       |
| S19 | 69643         | F             | 24         | 161                | 50                 | 19.3       |
| S20 | 48747         | M             | 57         | 165                | 65                 | 23.9       |
| S21 | 61752         | M             | 34         | 176                | 74                 | 23.9       |
| S22 | 65812         | F             | 40         | 169                | 63                 | 22.1       |
| S23 | 23770         | M             | 32         | 169                | 50                 | 17.5       |
| S24 | 64988         | M             | 27         | 169.5              | 62                 | 21.6       |
| S25 | 55832         | F             | 54         | 155                | 49                 | 20.4       |
| S26 | 13758         | F             | 33         | 155                | 46                 | 19.1       |
| S27 | 65042         | F             | 35         | 160                | 60                 | 23.4       |
| S28 | 31523         | F             | 58         | 163                | 56                 | 21.1       |
| S29 | 115092        | M             | 35         | 178                | 51                 | 16.1       |
| S30 | 84928         | M             | 67         | 168                | 67                 | 23.7       |
| S31 | 51986         | F             | 54         | 155                | 47.5               | 19.8       |
| S32 | 102450        | F             | 67         | 155                | 56                 | 23.3       |
| S33 | 114501        | F             | 43         | 163                | 53                 | 19.9       |
| S34 | 42232         | F             | 54         | 161                | 62                 | 23.9       |
| S35 | 18351         | F             | 34         | 153                | 51                 | 21.8       |
| S36 | 47313         | F             | 35         | 168.5              | 47                 | 16.6       |
| S37 | 49205         | M             | 63         | 169.5              | 68                 | 23.7       |
| S38 | 84415         | M             | 65         | 165                | 54                 | 19.8       |
| S39 | 34592         | F             | 41         | 161                | 51                 | 19.7       |
| S40 | 31054         | F             | 49         | 157                | 45                 | 18.3       |
| S41 | 37027         | F             | 60         | 157                | 52.5               | 21.3       |

|     |       |   |    |       |       |      |
|-----|-------|---|----|-------|-------|------|
| S42 | 24673 | F | 52 | 163   | 59    | 22.2 |
| S43 | 15504 | M | 50 | 170   | 67    | 23.2 |
| S44 | 58194 | F | 42 | 158   | 52    | 20.8 |
| S45 | 71320 | M | 26 | 168   | 61    | 21.6 |
| S46 | 87415 | F | 63 | 160   | 70    | 27.3 |
| S47 | 21886 | M | 20 | 161   | 70    | 27   |
| S48 | 16478 | M | 42 | 174   | 86    | 28.4 |
| S49 | 16830 | F | 59 | 158   | 70    | 28   |
| S50 | 16528 | F | 27 | 166   | 86    | 31.2 |
| S51 | 32115 | M | 78 | 163   | 79    | 29.7 |
| S52 | 14065 | M | 33 | 176   | 98    | 31.6 |
| S53 | 52206 | M | 62 | 163   | 74    | 27.9 |
| S54 | 29772 | M | 43 | 170   | 81    | 28   |
| S55 | 94893 | M | 23 | 171   | 87    | 29.8 |
| S56 | 55794 | M | 49 | 175   | 95    | 31   |
| S57 | 57077 | F | 35 | 160   | 80    | 31.3 |
| S58 | 56127 | F | 26 | 153   | 72.5  | 31   |
| S59 | 52021 | F | 46 | 159   | 99    | 39.2 |
| S60 | 54294 | F | 41 | 159   | 100.4 | 39.7 |
| S61 | 35979 | F | 47 | 164   | 95    | 35.3 |
| S62 | 45421 | F | 22 | 160   | 90.4  | 35.3 |
| S63 | 51395 | F | 29 | 158   | 103   | 41.3 |
| S64 | 25697 | F | 37 | 154   | 79.9  | 33.7 |
| S65 | 97069 | M | 34 | 170   | 97    | 33.6 |
| S66 | 61917 | F | 26 | 166   | 82.9  | 30.1 |
| S67 | 62806 | F | 20 | 160   | 84.5  | 33   |
| S68 | 44477 | F | 41 | 159   | 74    | 29.3 |
| S69 | 52976 | F | 35 | 170   | 110   | 38.1 |
| S70 | 53911 | F | 55 | 152   | 78    | 33.8 |
| S71 | 35613 | F | 48 | 165   | 85.1  | 31.3 |
| S72 | 45512 | F | 37 | 158   | 70.3  | 28.2 |
| S73 | 61104 | M | 48 | 165   | 85    | 31.2 |
| S74 | 48071 | F | 42 | 148.5 | 69.2  | 31.4 |
| S75 | 68550 | F | 33 | 151   | 68    | 29.8 |
| S76 | 65130 | F | 48 | 159   | 88    | 34.8 |
| S77 | 85723 | M | 33 | 175   | 95    | 31   |
| S78 | 53911 | F | 89 | 181   | 89    | 27.2 |
| S79 | 53743 | F | 43 | 166   | 88.7  | 32.2 |
| S80 | 48547 | F | 33 | 158   | 71.7  | 28.7 |
| S81 | 74699 | F | 42 | 158   | 90.4  | 36.2 |

---
